# Supplementary material
Source: PubMed Central journal article supplement (PMC4078075)
Supplement: NIHMS603273-supplement-01.pdf [file NIHMS603273-supplement-01.pdf]

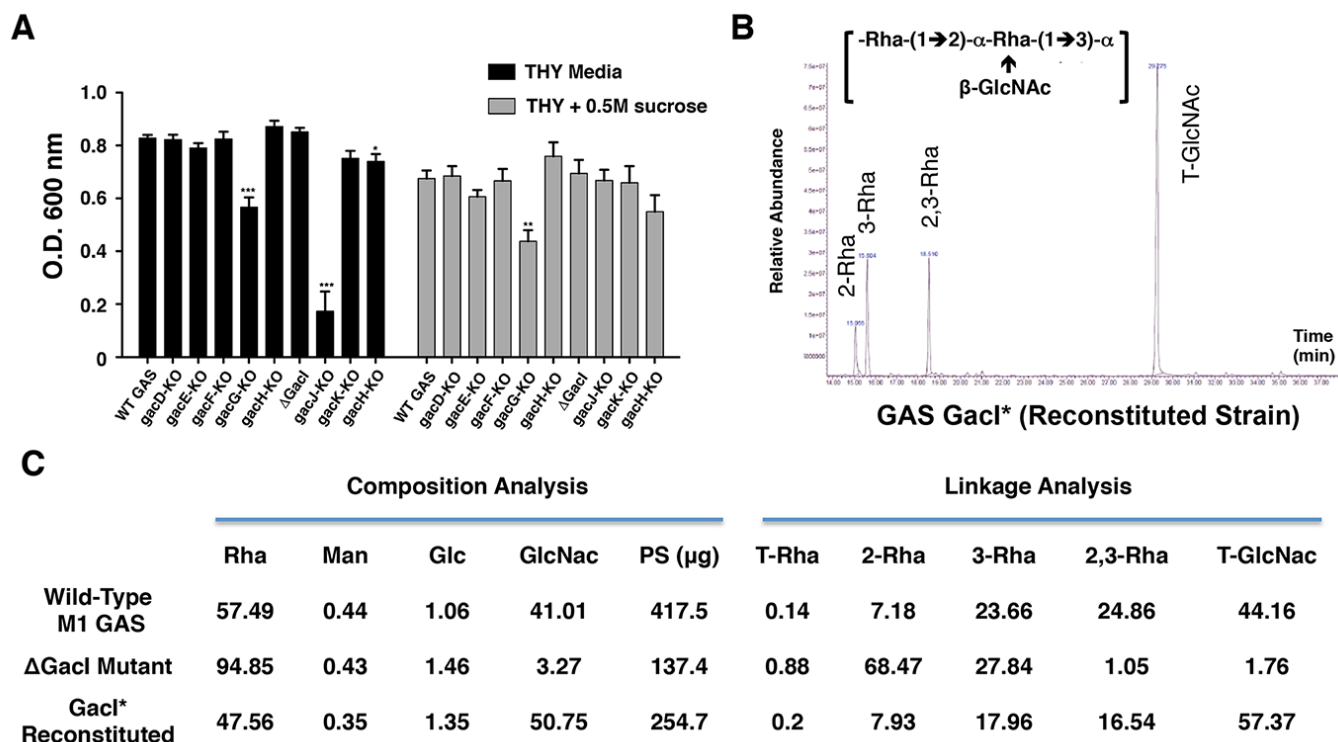

**Figure S1, related to Figure 1. Supplemental Data on Growth and Polysaccharide Composition of GAC Mutants**

(A) Growth of GAC insertional mutants in rich broth. Plasmid integrational mutants in the GAC gene cluster were generated in the presence of osmotic stabilization (0.5 M sucrose) and targeted plasmid insertion was confirmed by PCR. Mutants were grown overnight in regular rich broth (THY) or THY + 0.5 M sucrose and the optical density at 600 nm recorded to determine the effects of mutation on bacterial growth. \* $p < 0.05$ , \*\* $p < 0.01$ , \*\*\* $p < 0.001$ . (B) HPLC tracing and linkage analysis with deduced schematic structure of the repeating unit of extracted GAC from the Gacl\* reconstituted mutant strain. (C) Carbohydrate composition analysis of GAC from GAS WT, ΔGacI, and reconstituted Gacl\* strains shows the mole percentage amount of individual sugars; the total amount of PS noted is that present in 1 ml of aqueous solution. Linkage analysis data represent the area percentages from the HPLC assay. Abbreviations: GAS = group A *Streptococcus*; PS = polysaccharide; Rha = Rhamnose; Man = Mannose; Glc = Glucose; GlcNAc = N-acetyl-D-glucosamine; T = terminally-linked.

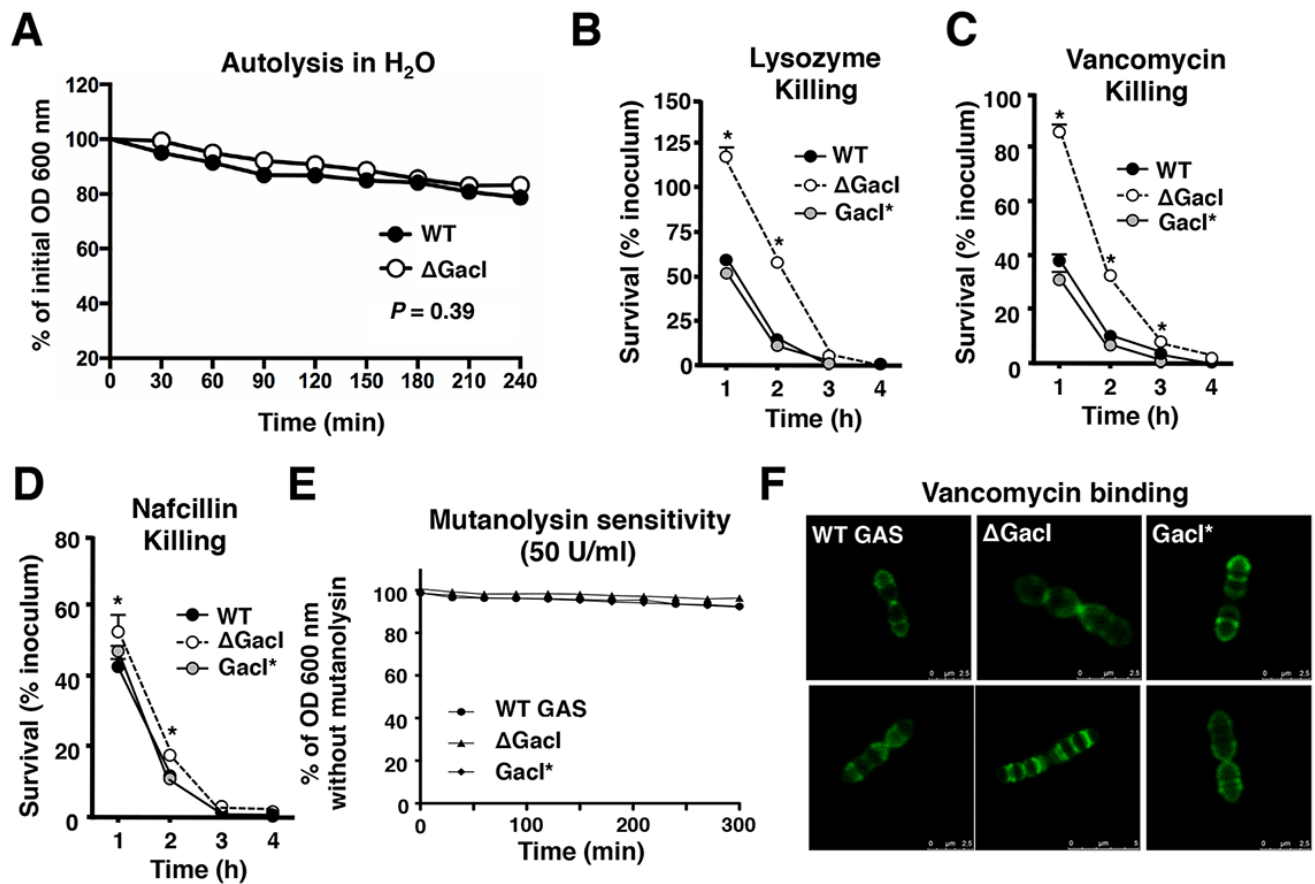

**Figure S2, related to Figure 3. Supplemental Data on Cell Wall Integrity of ΔGacI Mutant GAS**

(A) Sensitivity of GAS WT and ΔGacI to autolysis. Kinetics measured for (B) lysozyme-, (C) vancomycin-, and (D) nafcillin-mediated killing of GAS WT, ΔGacI, and GacI\* strains. Pooled normalized data from three independent experiments are shown (mean ± SEM; two-way ANOVA). \**p* < 0.05. (E) GAS WT, ΔGacI, and GacI\* bacteria are equally resistant to lysis by mutanolysin (50 U/ml; pooled data from two independent experiments, mean ± SEM). (F) Fluorescent vancomycin staining of exponentially growing GAS WT, ΔGacI, and GacI\* bacteria. Two representative pictures per strain are shown

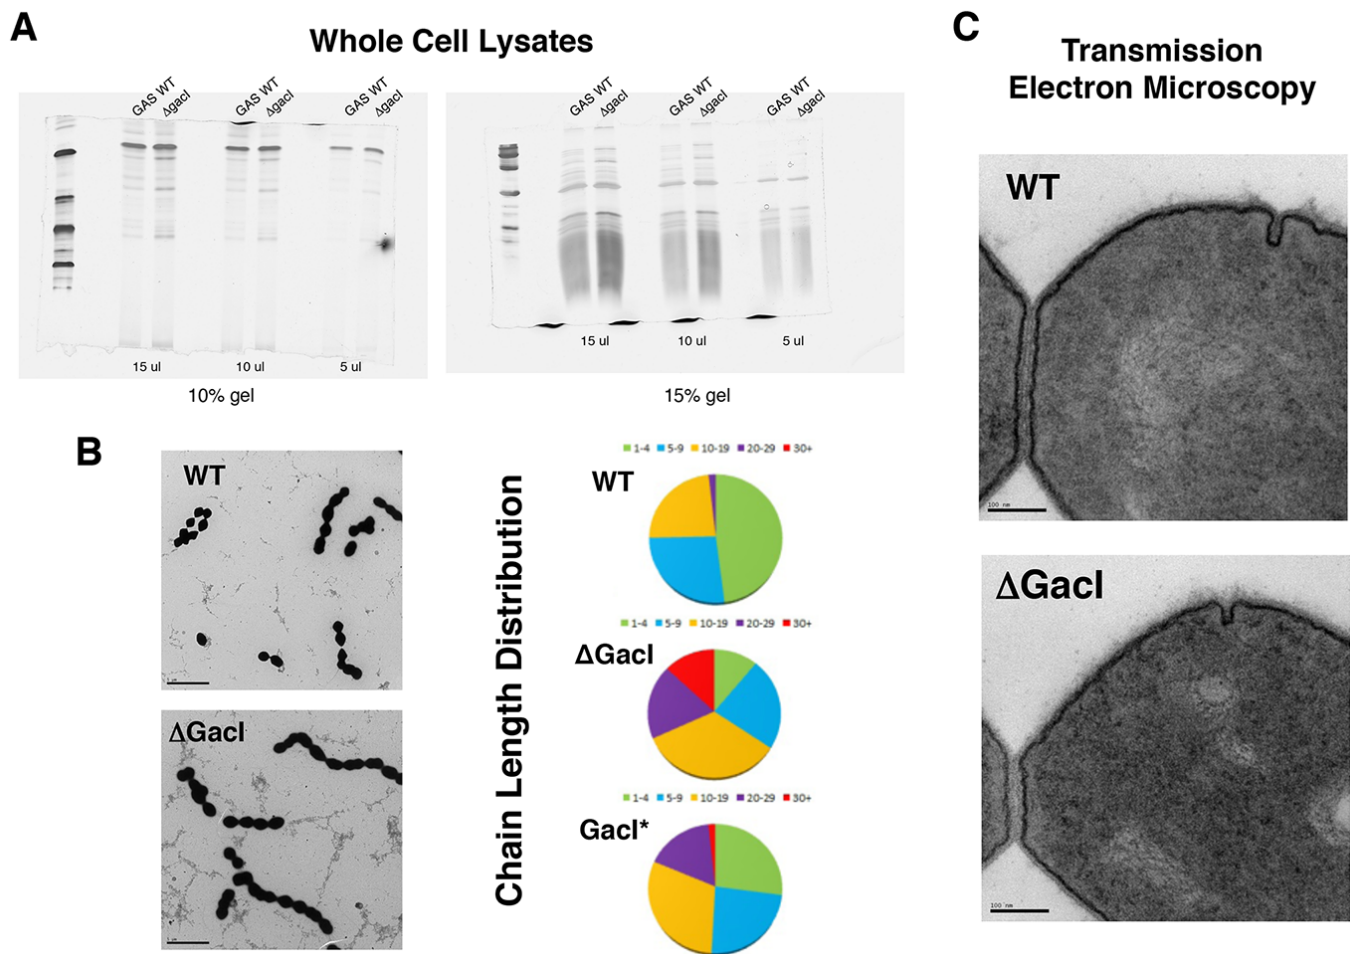

**Figure S3, related to Figure 4. Supplemental Data on Protein Composition and Morphology of  $\Delta$ GacI Mutant GAS**

(A) Similar protein profiles of cell lysates prepared from WT and  $\Delta$ GacI mutant GAS. WT and  $\Delta$ GacI strains were grown to exponential phase, harvested, and washed in PBS. Equivalent amounts of bacteria were resuspended in Tris buffer containing mutanolysin and lysostaphin and incubated at 37°C. Preparations were boiled in sample buffer and different amounts of bacterial lysate were separated on 10% and 15% SDS-PAGE gels and silver stained to visualize the bacterial protein profile. (B) Deletion of the *gacI* gene affects cell separation as deduced from an observed increase in chain length by microscopy. Chain length was quantified by counting the number of segments in a chain from at least 200 chains. Chain length was categorized as follows: 1-4 segments, 5-9 segments, 10-19 segments, 20-29 segments, or more than 30 segments per streptococcal chain. (C) Cell wall appearance by transmission electron microscopy of GAS WT and  $\Delta$ GacI mutant bacteria.

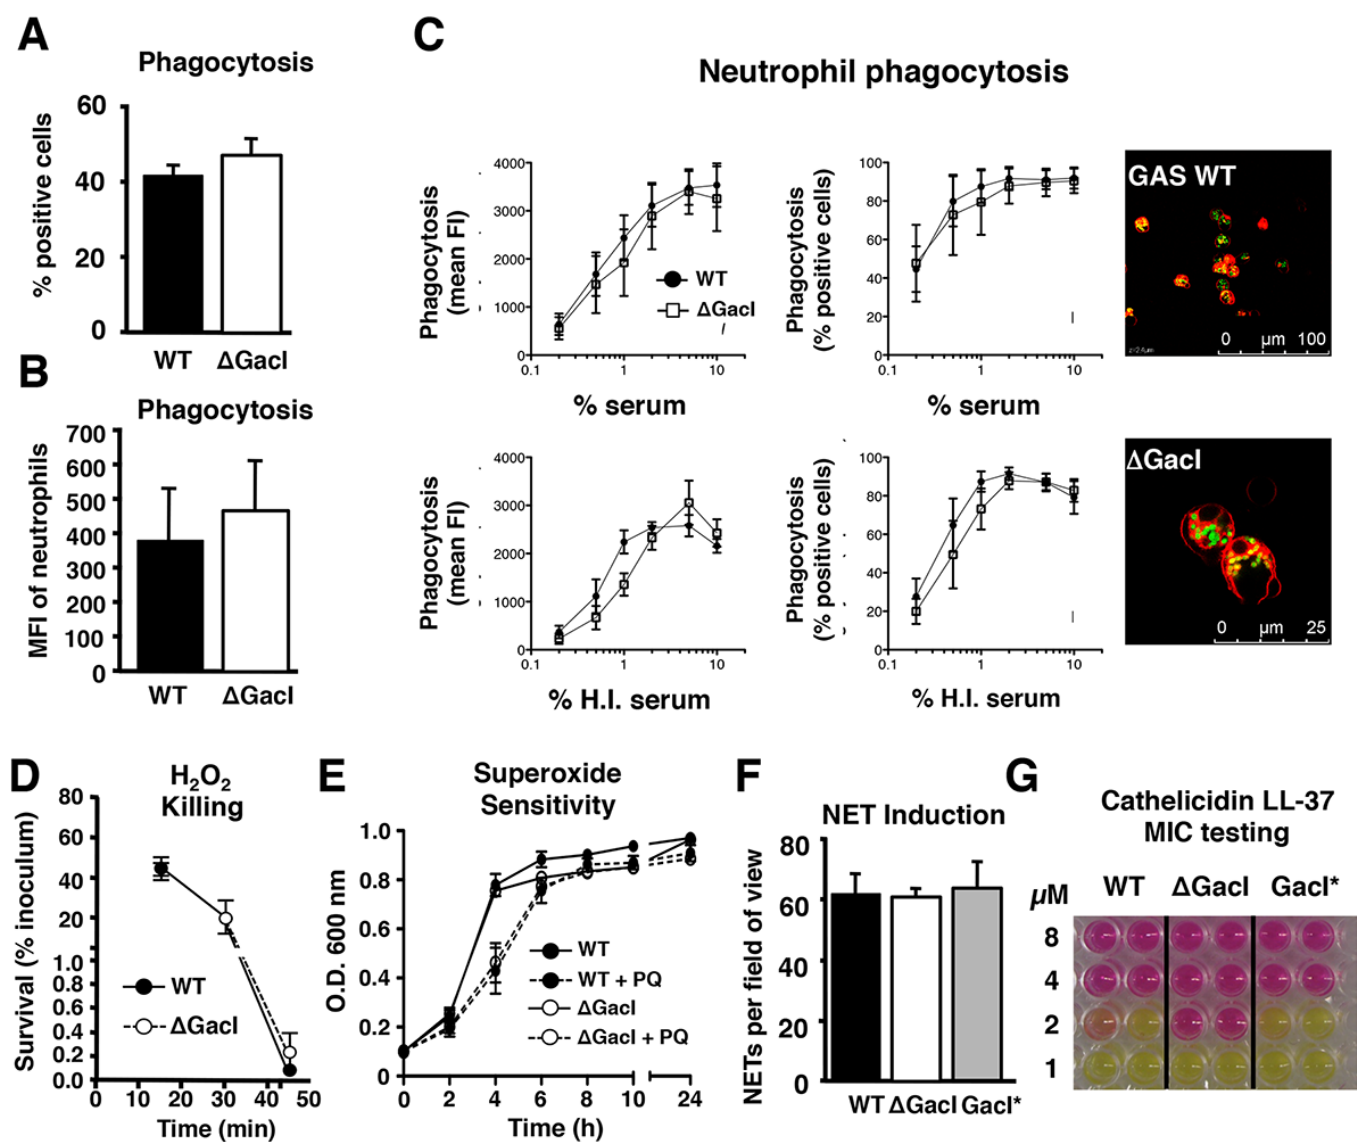

**Figure S4, related to Figure 5. Supplemental Data on  $\Delta$ GacI Mutant GAS Susceptibility to Neutrophil Phagocytosis, Reactive Oxygen Species, and Cathelicidin LL-37**

(A) Phagocytosis by neutrophils of fluorescently (FITC)-labeled GAS WT and  $\Delta$ GacI mutant bacteria in human whole blood. Data are presented as % FITC-positive neutrophils or (B), mean fluorescence intensity (MFI) on gated neutrophils. Pooled data from four independent experiments are shown (mean  $\pm$  SEM). (C) Quantification of phagocytosis by isolated neutrophils of FITC-labeled GAS WT and  $\Delta$ GacI mutant bacteria in the presence of different percentages of pooled active or heat-inactivated human serum. Data are presented as % FITC-positive neutrophils, and mean fluorescence intensity (MFI) on gated neutrophils. Pooled data from three independent experiments are shown (mean  $\pm$  SEM). Representative confocal images demonstrate intracellular localization of fluorescent GAS WT (top) and  $\Delta$ GacI mutant bacteria (bottom). Loss of the GlcNAc side chain does not affect resistance to oxidative stress including (D) hydrogen peroxide (pooled data from three independent experiments; mean  $\pm$  SEM), and (E) paraquat (PQ)-generated superoxide (pooled data from three independent experiments; mean  $\pm$  SEM). (F) Quantification of NET induction upon neutrophil incubation with the indicated bacterial strains (mean  $\pm$  SEM, two independent experiments). (G)  $\Delta$ GacI mutant bacteria are hypersensitive to human cathelicidin antimicrobial peptide LL-37 (MIC assay,  $t = 24$  h).

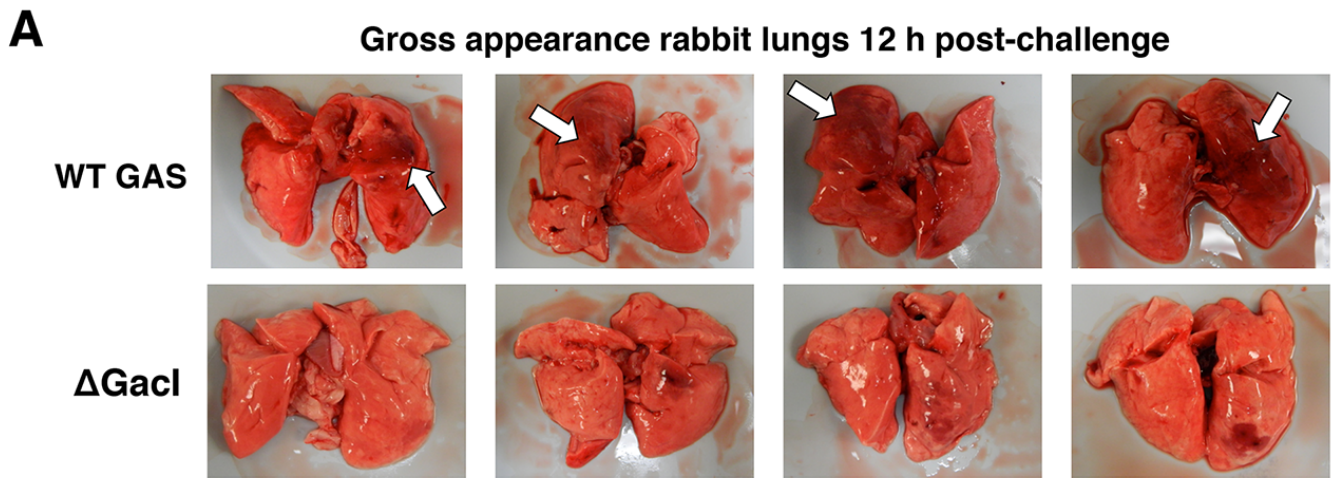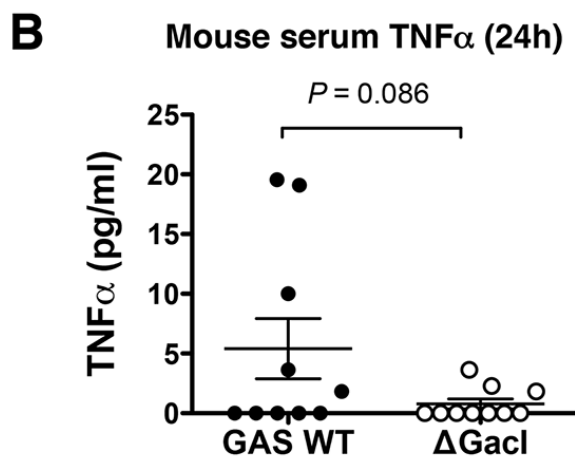

**Figure S5, related to Figure 6. Supplemental Data from Animal Challenge Studies with WT and  $\Delta$ GacI Mutant GAS**

(A) Gross lung appearance of rabbit lungs 12 h after infection with GAS WT or  $\Delta$ GacI mutant showing increased evidence of hemorrhagic necrosis in the WT-infected animals. (B) Trend toward lower serum TNF- $\alpha$  levels 24 h post intraperitoneal challenge in mice infected with  $\Delta$ GacI mutant GAS.

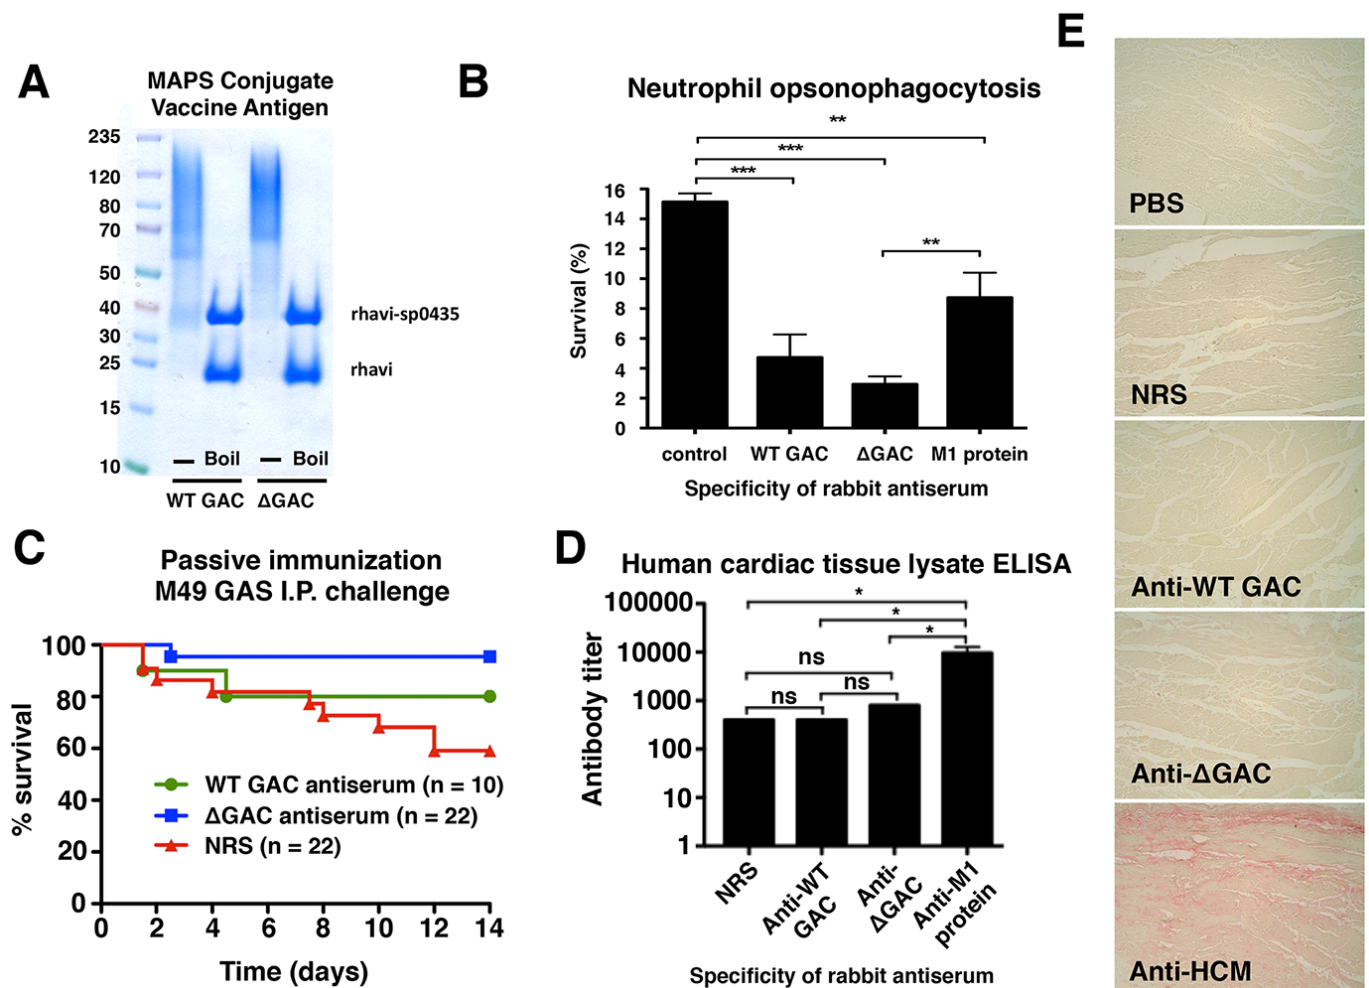

**Figure S6, related to Figure 7. Comparison of Activities of Rabbit Antisera Raised Against MAPS Protein Conjugates of WT GAC and ΔGAC**

(A) SDS-PAGE analysis of MAPS conjugate protein-GAC complexes prepared from WT GAC and ΔGAC carbohydrate and subjected to further gel-filtration purification. No exogenous protein contamination is appreciated in boiled, denatured samples. (B) Opsonophagocytic killing of serotype M1 GAS serotype upon addition of anti-ΔGAC antiserum, WT GAC antiserum, normal rabbit serum (NRS) and anti-M1 protein antiserum. (C) Mice are protected from infection with WT GAS M49 through passive immunization with ΔGAC antiserum or WT GAC antiserum compared to NRS. (D, E) Lack of cross-reactivity of WT GAC or ΔGAC rabbit antiserum against human cardiac tissue as assessed by (D) ELISA of human cardiac cell extract (anti-M1 protein positive control) and (E) direct immunohistochemistry of human cardiac tissue; 1:1,000 antibody dilution, anti-human cardiac myosin (HCM) used as positive control. \* $p < 0.05$ , \*\* $p < 0.01$ , \*\*\* $p < 0.001$ .
